## **“Pandemic of the unvaccinated”? At midlife, white people are less vaccinated but still at less risk of Covid-19 mortality in Minnesota**

Elizabeth Wrigley-Field<sup>1</sup>, Kaitlyn M. Berry<sup>2</sup>, Andrew C. Stokes<sup>3</sup>, Jonathon P. Leider<sup>4</sup>

<sup>1</sup>Department of Sociology and Minnesota Population Center, University of Minnesota

<sup>2</sup>Division of Epidemiology and Community Health, University of Minnesota School of Public Health

<sup>3</sup>Department of Global Health, Boston University School of Public Health

<sup>4</sup>Division of Health Policy and Management, University of Minnesota School of Public Health

### ABSTRACT

Recent research underscores the exceptionally young age distribution of Covid-19 deaths in the United States compared with international peers. We show that the high level of Covid mortality at midlife ages (45-64) is deeply intertwined with continuing racial inequality in Covid-19 mortality, which persists even in contexts in which non-white populations might seem to have a survival advantage. We use data from Minnesota, which allows vaccination and mortality rates to be observed with greater age and temporal precision than national data. At midlife ages in Minnesota, Black, Hispanic, and Asian populations were all more highly vaccinated than white populations during the state’s substantial and sustained Delta surge. Yet white mortality rates were lower than those of all other racial groups. These mortality disparities were extreme; during the Delta period, non-white Covid-19 mortality at ages 55-64 was greater than white mortality at 10 years older. This discrepancy between vaccination and mortality patterning by race suggests that, if the current period is a “pandemic of the unvaccinated,” it also remains a “pandemic of the disadvantaged” in ways that can decouple from vaccination rates. This result implies an urgent need to center health equity in the development of Covid-19 policy measures.

### KEYWORDS:

COVID-19, vaccination, mortality disparities, race and ethnicity, midlife mortality

### CORRESPONDING AUTHOR:

Elizabeth Wrigley-Field

[ewf@umn.edu](mailto:ewf@umn.edu)

Department of Sociology

University of Minnesota

The introduction of effective vaccines in early 2021 resulted in a general consensus, for a time, that future surges would lead to a “pandemic of the unvaccinated.”<sup>1</sup> If this supposition held, Covid-associated mortality by group would become highly reflective of vaccine status. In the present study, we evaluated this supposition for different racial/ethnic groups in Minnesota using death certificate data on all Covid-19 deaths from March 2020 to December 2021.

We examined Minnesota because of the unique availability of near-real-time data on both vaccination status and Covid-19 mortality that are simultaneously separated by race/ethnicity and age and cover individual time periods within the pandemic. In contrast, national vaccination data that are race/ethnicity-specific are not separated by age. Minnesota also stands out for its prolonged and deadly surge of the Delta variant, which did not end until it was supplanted by the Omicron surge at the end of 2021.<sup>2</sup> The resulting high mortality in Fall 2021 allows us to explore mortality in specific racial/ethnic groups at key midlife ages, when many Covid deaths occur in the U.S.<sup>3-5</sup>

## Results

By the end of 2021 in Minnesota, vaccination among white Minnesotans was outpaced by vaccination among Black, Indigenous, and People of Color (BIPOC) Minnesotans at midlife ages (ages 45-64). Yet in all age groups and in each phase of the pandemic, white mortality was substantially lower than mortality among Minnesotans of color (Fig. 1A-1C).

White undervaccination at midlife ages is pronounced: at the end of 2021, “fully vaccinated” rates were 77% for BIPOC Minnesotans compared to only 70% for white Minnesotans (Fig. 1B). Yet, the gap in BIPOC-white mortality at those same ages was extreme; for example, during the Delta period, for both men and women, BIPOC mortality at ages 55-64 was higher than white mortality at ages 65-74 (Fig. 1D). Despite relatively high vaccination rates, BIPOC populations

as a whole had, not only greater Covid-19 mortality than same-age whites, but Covid-19 mortality equivalent to more than 10 years of additional age (at white mortality levels).

At key midlife ages (45-64), Minnesota's white population is its second-least vaccinated racial/ethnic group (following Native Americans) (Fig 2A). However, despite low vaccination rates, Minnesota's white population aged 45-64 has lower mortality than all other racial/ethnic groups, which ranged, during the period dominated by the Delta variant, from 125% (Asian) to 490% (Native) of white mortality (Fig 2B). Due to the relatively old age of the white population even within this age group, in age- and gender-standardized rates, the disparities in this period are even starker, with other racial groups ranging from 155% (Asian) to 511% (Native) of white mortality (Fig 2C). Figure 2D underscores this discrepancy: there is a generally close relationship between racial/ethnic groups' mortality during the Delta period and their vaccination rates at that period's midpoint—with the striking exception of white Minnesotans, who are advantaged relative to even the highest-vaccinated group, Asian-Americans.

## **Discussion**

The present study found that despite lower vaccination rates (compared to all but Native Minnesotans), during the Delta surge and early Omicron surge in late 2021, white Minnesotans had lower Covid-19 mortality at midlife than did Black, Hispanic, Asian, and Native Minnesotans. We note two broad possible explanations for these puzzling results. One possibility is that racial inequality in Covid-19 mortality risk—due to differential transmission, comorbidities, or unequal medical access<sup>4</sup>—among the unvaccinated, the vaccinated, or both, may be so great that it simply overwhelms the differences in vaccination status. A second possibility is that findings may reflect vaccine differences within the “fully vaccinated” population, with people of color potentially less likely to have received booster shots and less

likely to have received mRNA vaccines in their primary series.<sup>5</sup> These possibilities reflect the continuing inequities of the pandemic even in the period of widespread vaccination.

Regardless of the precise mechanism, the findings suggest that the “pandemic of the unvaccinated” formulation is incomplete and that Covid-19 also remains a “pandemic of the disadvantaged.” If population mortality primarily reflected population vaccination rates, then we would have expected to find that white communities in midlife would have an equal or greater burden of Covid-19 mortality than communities of color. The fact that we did not observe such a finding indicates that social and structural determinants of health, such as health care access, occupational risks, language barriers, and housing conditions, continue to fundamentally shape risk of Covid-19 mortality even in the Delta/Omicron period.<sup>4,6-9</sup>

While a “pandemic of the unvaccinated” framing may be used as a rationale for current policy actions at the federal and state levels, which include phasing out vaccine and mask mandates and accelerating a “return to normal,” a “pandemic of the disadvantaged” framing emphasizes the need for sustained population-based Covid-19 prevention and mitigation strategies that center health equity. Such measures could aim to further increase vaccination with intensive communication campaigns organized with community partners, widespread and expedited access to walk-in vaccine clinics (including for those working atypical hours), paid sick leave facilitating vaccination in the context of feared side effects, and vaccine delivery programs targeting low-income neighborhoods, schools, and workplaces. Such measures might also aim to mitigate Covid-19 spread, acknowledging that, even in contexts in which vaccine uptake among people of color is relatively high, the mortality burden of the pandemic remains unequally borne. The pandemic of the disadvantaged framing suggests that a sole emphasis on individual behavior will not be adequate for reducing health inequities at midlife.

The extent to which findings in Minnesota may resemble those of other state contexts is unclear. If vaccination rates are generally higher in metropolitan areas compared with rural areas, other states with very urban populations of color and large rural white populations may show

similar vaccination disparities. At the national level, aggregated over all ages, the white population does not have a lower vaccination rate than all BIPOC communities, although in most states, white vaccination is lower than the high average age of white populations would predict.<sup>10</sup> However, the lack of publicly available data on the age composition of vaccine status by race/ethnicity for the U.S. as a whole limits the ability to know how widespread the midlife patterns identified here may be.

Recent research emphasizes the exceptionally young age distribution of Covid-19 deaths in the United States relative to other countries.<sup>11,12</sup> The results in the present study highlight how this distinctive risk at midlife may be intertwined with the deep inequality in U.S. Covid-19 mortality. Populations of color may be at notably high risk at midlife—even when they have greater vaccination rates than white people at the same ages.

## **Materials & Methods**

Death certificate data and Covid-19 vaccination data were obtained from the Minnesota Department of Public Health (MDH). Deaths were defined as Covid-19 deaths if there was any mention of U07.1 on the death certificate. We calculated Covid-19 death rates by race/ethnicity for three pandemic periods corresponding to pre-vaccination (March 2020-January 2021), mid-vaccination (February-July 2021), and late-vaccination, Delta-dominated (July-December 2021) time periods. The “Delta period” also includes the very early stages of the Omicron surge in Minnesota.

The death certificates analyzed were those included in a data release from MDH on February 1, 2022. Among 2021 Covid-19 deaths included in the death certificate database, 91% were added to these regularly-updated data within three weeks following the date of death. Thus, these data are likely close to complete for 2021 deaths but may underreport a small proportion of deaths in late December.

To create death rates from the death certificates, we used 2020 population estimates from the National Center for Health Statistics (NCHS), as the most recently available estimates. We chose not to project denominators for 2021, instead using official 2020 estimates, since 2020 population dynamics (shaping 2021 populations) are so distinctive relative to the dynamics of prior years. In order to report death rates across periods of unequal length (e.g., an 11-month pre-vaccination period vs. a 6-month Delta period), we annualized all rates. To construct age- and gender-standardized death rates at midlife, we performed a “direct” standardization that reweights each race/ethnic population’s mortality using a shared set of weights.<sup>13</sup> As our “standard” population weights, we used the 5-year-age and gender distribution of the full 2020 Minnesota population at ages 45-64.

We defined “vaccinated” as “fully vaccinated,” which means two doses of an mRNA-based vaccine or one dose of adenoviral vaccine. We used “fully vaccinated” rather than “single-shot vaccinated” as our vaccination metric because full vaccination provides greater protection and is likely to be reported with higher data quality.<sup>14</sup> Booster shot uptake is not available by race/ethnicity in Minnesota.

Vaccine data were reported at the adult age categories 19-44, 45-64, and 65+; our main mortality analyses accordingly used these groups. Some racial group populations are too small to examine separately for ages 65+ in Minnesota. Thus, we show individual racial groups at ages 45-64 (Fig. 2) and dichotomous white vs. BIPOC when examining all age groups separately (Fig. 1). Mortality analyses support the use of the BIPOC category because, in Minnesota, the primary mortality divide at all high-mortality ages, all time periods, and for both genders is between white Minnesotans vs. all others.<sup>15</sup> We report mortality rates using race-bridging for multiracial

populations; vaccination rates are reported by the state with single-race populations. We use denominators constructed with the appropriate racial categories for these respective numerators.

Minnesota vaccination data are reported as population percentages using 2018 population denominators. These denominators can result in unrealistically high vaccination estimates for growing subpopulations; for example, state data report that 100% of Black and Asian Minnesotans aged 65+ are fully vaccinated. We adjusted these vaccine rates using the ratio of 2020 to 2018 population sizes. We note that, because state vaccination data for Black and Asian populations aged 65+ are top-coded at 100%, our adjusted estimates likely under-estimate vaccination for these populations; moreover, under-estimating these two groups will produce likely under-estimation in the BIPOC category as a whole since Black and Asian populations together constitute 69% of the 65+ BIPOC population. This under-estimation is conservative for our argument by exaggerating the extent to which white populations aged 65+ are more vaccinated than BIPOC populations (Fig 1C).

## **Acknowledgements**

This research was supported by the Eunice Kennedy Shriver National Institute on Child Health and Human Development (P2CHD041023, F31HD107980), the National Institute on Aging (P30AG066613, R01AG060115-04S1), the Robert Wood Johnson Foundation (Grant #77521), and the University of Minnesota School of Public Health. The interpretations, conclusions, and recommendations in this work are those of the authors and do not necessarily represent the views of the National Institutes of Health or the Robert Wood Johnson Foundation. We thank Michelle Niemann and Matthew Plummer for helpful comments.

## **Data Availability**

Data are available at [https://osf.io/bxjkh/?view\\_only=80e912ce2b624ab7a78e51754c3952e3](https://osf.io/bxjkh/?view_only=80e912ce2b624ab7a78e51754c3952e3)



## References

1. Sullivan B. U.S. COVID Deaths Are Rising Again. Experts Call It A “Pandemic Of The Unvaccinated.” *NPR*. <https://www.npr.org/2021/07/16/1017002907/u-s-covid-deaths-are-rising-again-experts-call-it-a-pandemic-of-the-unvaccinated>. Published July 16, 2021. Accessed February 18, 2022.
2. Situation Update for COVID-19 - Minnesota Dept. of Health - February 25, 2022. Accessed February 26, 2022. <https://www.health.state.mn.us/diseases/coronavirus/situation.html>
3. Wrigley-Field E, Kiang MV, Riley AR, et al. Geographically targeted COVID-19 vaccination is more equitable and averts more deaths than age-based thresholds alone. *Sci Adv*. 2021;7(40):eabj2099.
4. Goldman N, Pebley AR, Lee K, Andrasfay T, Pratt B. Racial and ethnic differentials in COVID-19-related job exposures by occupational standing in the US. *PLoS One*. 2021;16(9):e0256085.
5. Faust JS, Renton B, Essien UR, Gounder CR, Lin Z, Krumholz HM. Racial and ethnic disparities in COVID-19 vaccinations in the United States during the booster rollout. *bioRxiv*. Published online December 14, 2021. doi:10.1101/2021.12.12.21267663
6. Bailey ZD, Feldman JM, Bassett MT. How Structural Racism Works - Racist Policies as a Root Cause of U.S. Racial Health Inequities. *N Engl J Med*. 2021;384(8):768-773.
7. McClure ES, Vasudevan P, Bailey Z, Patel S, Robinson WR. Racial Capitalism Within Public Health-How Occupational Settings Drive COVID-19 Disparities. *Am J Epidemiol*. 2020;189(11):1244-1253.
8. Chen YH, Glymour M, Riley A, et al. Excess mortality associated with the COVID-19 pandemic among Californians 18-65 years of age, by occupational sector and occupation: March through November 2020. *PLoS One*. 2021;16(6):e0252454.
9. Macias Gil R, Marcelin JR, Zuniga-Blanco B, Marquez C, Mathew T, Piggott DA. COVID-19 Pandemic: Disparate Health Impact on the Hispanic/Latinx Population in the United States. *J Infect Dis*. 2020;222(10):1592-1595.
10. Wrigley-Field E, Berry KM, Persad G. Race-specific, U.s. state-specific COVID-19 vaccination rates adjusted for age. *medRxiv*. Published online November 21, 2021. doi:10.1101/2021.11.19.21266612
11. Schöley J, Aburto JM, Kashnitsky I, et al. Bounce backs amid continued losses: Life expectancy changes since COVID-19. *bioRxiv*. Published online February 24, 2022. doi:10.1101/2022.02.23.22271380
12. de Walque Paul Gubbins Beatriz Piedad Urdinola Jeremy Veillard GDD. COVID-19 Age-Mortality Curves for 2020 Are Flatter in Developing Countries Using Both Official Death Counts and Excess Deaths.

<https://documents1.worldbank.org/curated/en/718461634217653573/pdf/COVID-19-Age-Mortality-Curves-for-2020-Are-Flatter-in-Developing-Countries-Using-Both-Official-Death-Counts-and-Excess-Deaths.pdf>

13. Samuel H. Preston, Patrick Heuveline, Michel Guillot. *Demography: Measuring and Modeling Population Processes*. Wiley-Blackwell; 2000.
14. Galewitz P. Health Experts Worry CDC's Covid Vaccination Rates Appear Inflated. Kaiser Health News. Published December 9, 2021. Accessed March 1, 2022. <https://khn.org/news/article/cdc-senior-covid-vaccination-rates-appear-inflated/>
15. Wrigley-Field E, Garcia S, Leider JP, Robertson C, Wurtz R. Racial Disparities in COVID-19 and Excess Mortality in Minnesota. *Socius*. 2020;6:2378023120980918.

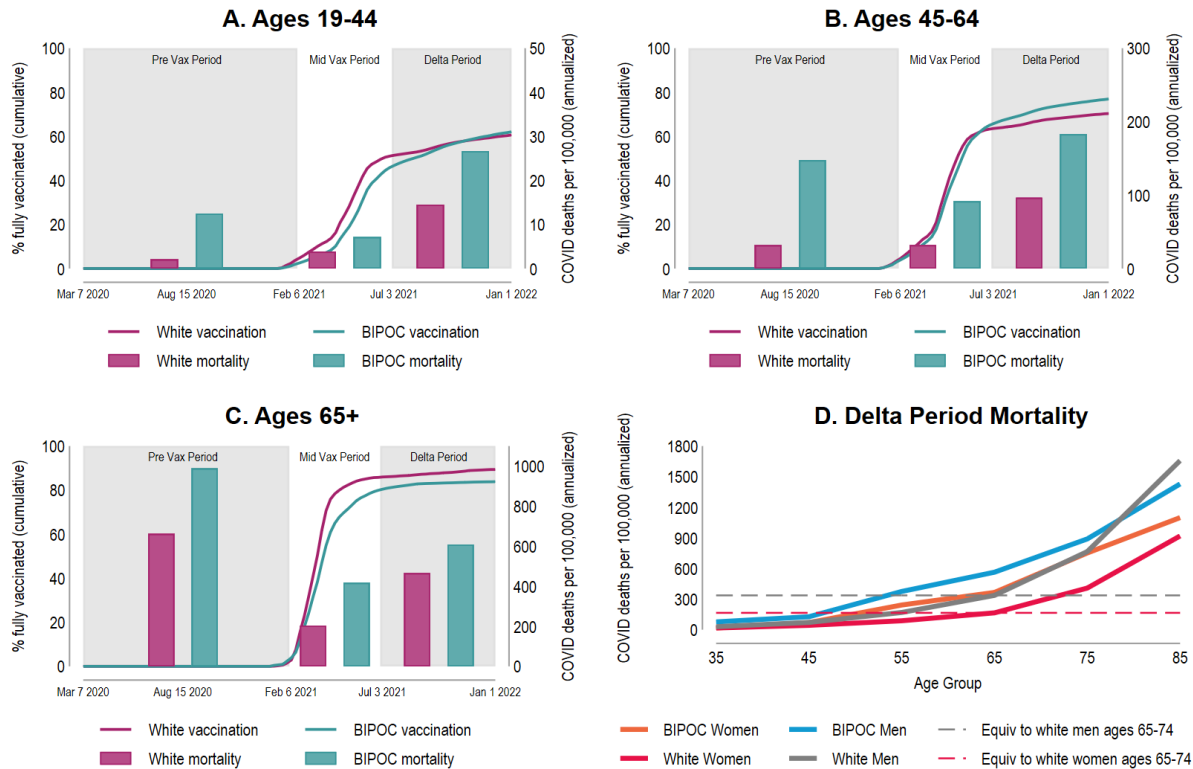

**Figure 1. Period-specific vaccination rates and Covid-19 mortality rates for white and BIPOC Minnesotans by age.** The lines in panels A-C depict the cumulative vaccination progress of each group over time as measured by the percentage of that race-specific, age-specific group that have completed their vaccine series (left axis). The bars in panels A-C depict the race-specific, age-specific mortality rates (right axis) during the pre-vaccination period, mid-vaccination period, and Delta period of the pandemic. Mortality rates are annualized to facilitate comparison across periods. Vaccination rates and mortality rates are presented for Minnesotans ages 19-44 (Panel A), ages 45-64 (Panel B), and ages 65+. Panel D shows how Covid-19 mortality rates increase with increasing age for BIPOC women, white women, BIPOC men, and white men. The dashed lines show the relatively lower age at which BIPOC groups experience the same mortality rates as white groups at ages 65-74.

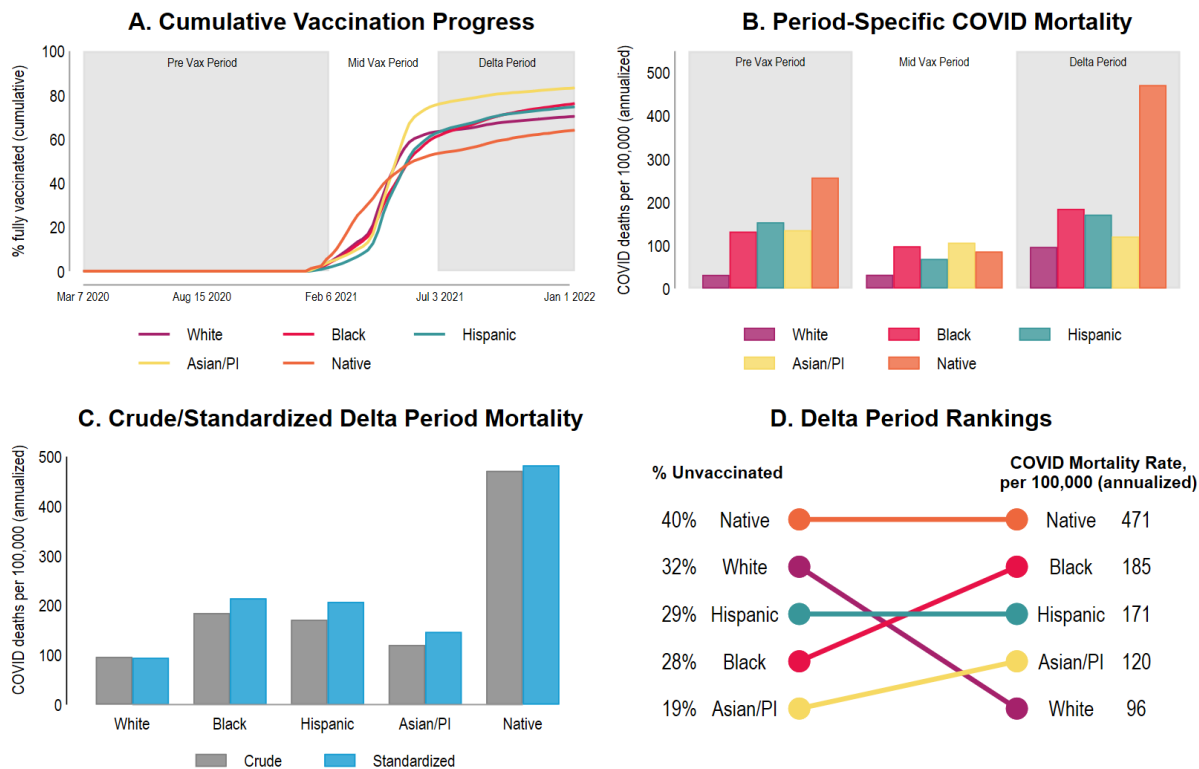

**Figure 2. Period-specific vaccination rates and Covid-19 mortality rates at midlife (ages 45-64) by race/ethnicity in Minnesota.** Panel A shows the cumulative vaccination progress of each racial group over time at midlife as measured by the percentage of that group who have completed their vaccine series. Panels B-D show midlife Covid mortality; mortality rates are annualized to facilitate comparison across periods. Panel B depicts the race-specific mortality rates during the pre-vaccination period, mid-vaccination period, and Delta period of the pandemic. Panel C compares crude and age- and gender-standardized mortality rates during the Delta period. Panel D compares the ranking of racial groups, from worst to best performing, by percent unvaccinated and mortality rates during the Delta period. The vaccination data in Panel D is from the midpoint of this period (October 2, 2021) and the mortality rates cover the entire Delta period (July 2021 to December 2021).
